# Supplementary material
Source: Springer Nature journal article supplement (https://www.springermedizin.de/resource/supplementary/13019_2012_630_MOESM2_ESM.pdf/9638754)
Supplement: MOESM2 [file 9638754]

|                                         |                           | All cases<br>(n=25) |
|-----------------------------------------|---------------------------|---------------------|
| Age                                     | (year)                    | 65.7 ± 6.9          |
| Gender                                  | Male                      | 21                  |
|                                         | Female                    | 4                   |
| Location of tumor                       | Upper thoracic esophagus  | 4                   |
|                                         | Middle thoracic esophagus | 13                  |
|                                         | Lower thoracic esophagus  | 8                   |
| Thoracic approach                       | Thoracoscopy              | 21                  |
|                                         | Thoracotomy               | 4                   |
| Abdominal approach                      | Laparoscopy               | 19                  |
|                                         | Laparotomy                | 6                   |
| Reconstruction organ                    | Stomach                   | 22                  |
|                                         | Pedicled jejunum          | 3                   |
| Postoperative morbidity                 | Present                   | 11                  |
|                                         | Absent                    | 14                  |
| Classification of main tumor            | Squamous cell carcinoma   | 20                  |
|                                         | Adenocarcinoma            | 4                   |
|                                         | Basaloid                  | 1                   |
| pT(UICC)                                | pT1a                      | 1                   |
|                                         | pT1b                      | 7                   |
|                                         | pT2                       | 0                   |
|                                         | pT3                       | 16                  |
|                                         | pT4                       | 1                   |
| pN(UICC)                                | pN0                       | 8                   |
|                                         | pN1                       | 5                   |
|                                         | pN2                       | 8                   |
|                                         | pN3                       | 4                   |
| pStage (UICC)                           | IA                        | 4                   |
|                                         | IIA                       | 3                   |
|                                         | IIB                       | 2                   |
|                                         | IIIA                      | 6                   |
|                                         | IIIB                      | 6                   |
|                                         | IIIC                      | 4                   |
| Lymphatic invasion                      | +                         | 10                  |
|                                         | -                         | 15                  |
| Venous invasion                         | +                         | 4                   |
|                                         | -                         | 21                  |
| Pulmonary metastasis                    | Solitary                  | 6                   |
|                                         | Multiple                  | 19                  |
| Extrapulmonary metastasis               | Present                   | 11                  |
|                                         | Absent                    | 14                  |
| Chemotherapy for pulmonary metastasis   | Present                   | 24                  |
|                                         | Absent                    | 1                   |
| Pulmonary resection                     | Resected                  | 5                   |
|                                         | Nonresected               | 20                  |
|                                         | Within 2 year             | 16                  |
| Time of recurrence (from esophagectomy) | More than 2 years         | 9                   |
